# Supplementary material for: Impact of Epithelial–Mesenchymal Immunophenotype on Local Aggressiveness in Papillary Thyroid Carcinoma Invading the Airway
Source: MDPI journal article supplement (doi:10.3390/jcm10194351), 2021-09-24
Supplement: s1 [file s1]

# Supplementary Materials

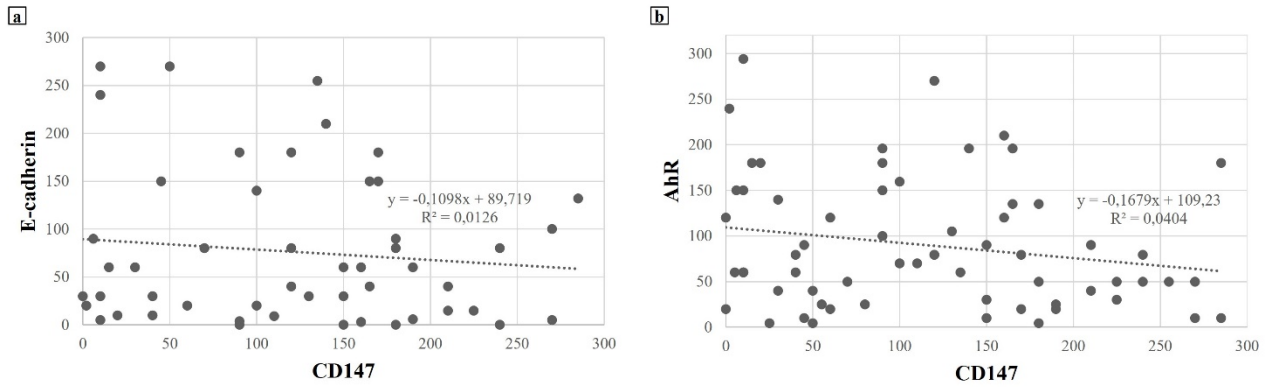

Figure S1. (a) Negative correlation between the expression of CD147, E-cadherin and (b) AhR.

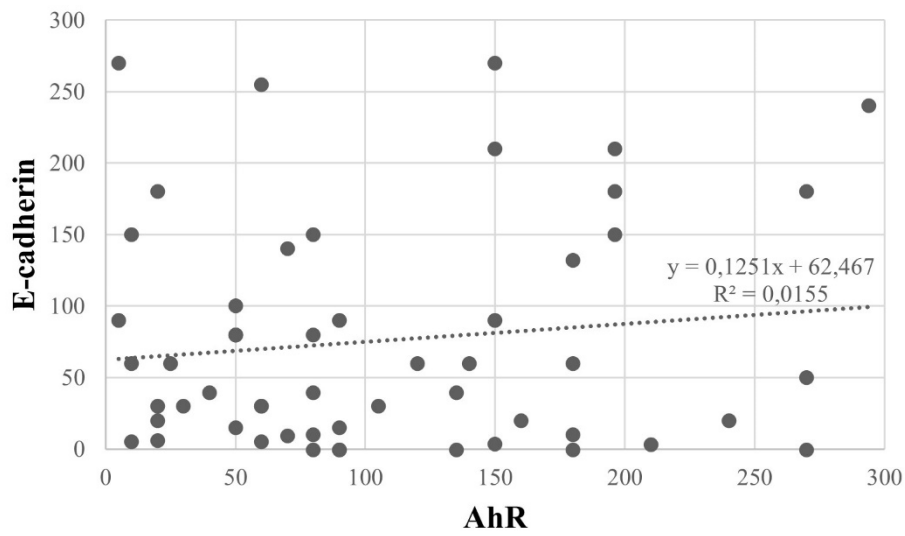

Figure S2. Positive correlation between the expression of AhR and E-cadherin.
